# 1 Challenges in the implementation of preventive treatment for 2 tuberculosis in people living with HIV/Aids: A qualitative study

3 Vânia Silva dos Reis<sup>1,2</sup><sup>¶</sup>, Débora Dupas Gonçalves do Nascimento<sup>3</sup><sup>¶</sup>, Terezinha  
4 Alcântara da Silva<sup>1,4</sup>, Anamaria Mello Miranda Paniago<sup>2,4</sup>, Adriana Carla Garcia  
5 Negri<sup>1,4</sup>, Gabriela Ferreira<sup>4</sup>, Rafaela Ferreira<sup>5</sup>, Everton Ferreira Lemos<sup>6</sup>, Anete  
6 Trajman<sup>7</sup>, Sandra Maria do Valle Leone de Oliveira<sup>2,3</sup><sup>¶</sup>

7 <sup>1</sup>Infectious and Parasitic Diseases Unit, Maria Aparecida Pedrossian University  
8 Hospital, Brazilian Company of Hospital Services, Federal University of Mato  
9 Grosso do Sul, Campo Grande, Brazil

10 <sup>2</sup>Graduate Program in Infectious and Parasitic Diseases, Faculty of Medicine,  
11 Federal University of Mato Grosso do Sul, Campo Grande, Brazil

12 <sup>3</sup>Fiocruz, Mato Grosso do Sul, Brazil

13 <sup>4</sup>Federal University of Mato Grosso do Sul, Campo Grande, Brazil

14 <sup>5</sup>Charity Association Santa Casa de Campo Grande, Mato Grosso do Sul, Brazil

15 <sup>6</sup>State University of Mato Grosso do Sul, Brazil

16 <sup>7</sup>Federal University of Rio de Janeiro, Brazil

17 <sup>¶</sup>These authors contributed equally to this work.

18 \* **Corresponding author:**

19 E-mail: [sandra.leone@fiocruz.br](mailto:sandra.leone@fiocruz.br)

20

## 21 Abstract

22 Treatment of tuberculosis infection (TBI) in people living with HIV/Aids (PLWHA)  
23 reduces the risk of tuberculosis disease (TBD), the main cause of death in this  
24 population. Recognizing the barriers related to the scale up of tuberculosis  
25 preventive treatment (TPT) can contribute to reorganization of health services for  
26 achieving TB elimination. This qualitative study aimed to understand the  
27 perception of specialized care health professionals of a capital city in Brazil about  
28 TPT for PLWHA. Between October 2020 and August 2022 ten physicians and  
29 four nurses working for more than six months in reference HIV/Aids services were  
30 interviewed. Interviews were guided by a script of previously validated, semi-  
31 structured questions. The audios were recorded, transcribed, and categorized  
32 based on Grounded Theory, and its analysis was anchored in the theoretical

NOTE: This preprint reports new research that has not been certified by peer review and should not be used to guide clinical practice.

33 framework of Symbolic Interactionism. Sampling was performed using theoretical  
34 saturation. The emerged central phenomenon “Facing challenges in the  
35 implementation of TPT in the light of scientific evidence” was supported by four  
36 categories: 1) Demonstrating theoretical knowledge regarding TBI and its  
37 treatment guidelines; 2) Dealing with the complexities of guidelines adherence in  
38 the routine service; 3) Building bonds to overcome different challenges in the care  
39 of PLWHA; 4) Seeking strategies to facilitate adherence to the TPT guidelines  
40 service. Professionals faced challenges in implementing TPT due to structural  
41 obstacles in service, hesitation in establishing therapy, and the risk of adverse  
42 events when dealing with patients' vulnerabilities, despite available scientific  
43 evidence, theoretical knowledge, and guidelines recommendations. They  
44 envisaged ideal conditions to adhere to the TPT guidelines in service, and sought  
45 to mediate confrontations by strengthening their bond with patients through  
46 multidisciplinary interaction, teaching, and research.

47

## 48 **Introduction**

49 Tuberculosis preventive treatment (TPT) is a crucial component of the strategy  
50 devised to end the global tuberculosis (TB) epidemic [1-4]. Although preventable  
51 and curable, TB is still the leading cause of death among people living with  
52 HIV/Aids (PLWHA), accounting for one-third of the deaths [1].

53 TPT in PLWHA was one of the top priorities at the high-level meeting of the United  
54 Nations (UN) on TB in 2018 [4] and globally, the target of offering 6 million TPT  
55 for PLWHA was attained and surpassed in 2021 [5]. This was achieved based on  
56 the World Health Organization (WHO) recommendation to offer TPT to PLWHA  
57 regardless of TBI tests and chest radiography (CXR) to exclude disease  
58 tuberculosis (TBD) when these tests were unavailable [1].

59 However, TPT uptake in PLWHA and other high-risk populations is low in Brazil,  
60 one of the 30 countries with high burden of TB and TB/HIV co-infection [1].  
61 Diagnosis and treatment of tuberculosis infection (TBI) are offered free of charge  
62 by the Public Unified Health System (SUS) in the country [6], but several

63 challenges lie in the implementation of TPT guidelines, with resulting low rates of  
64 TPT initiation and completion [3,7].

65 Previous studies have shown that educational activities for health care providers  
66 in the country can increase TPT prescription among household contacts in SUS,  
67 despite the need for testing [7]. This intervention was affordable [8] and  
68 sustainable [9]. However, among PLWHA, recent studies have shown low  
69 adherence by health professionals in prescribing TPT [10,11].

70 Understanding the subjectivity of individuals involved in TPT scale up can  
71 contribute to adherence to the national guidelines, with adoption of strategies to  
72 reduce barriers in health services. The objective of the current study was to  
73 understand the perception of specialized care health professionals regarding TPT  
74 for PLWHA in a capital city of the Midwest region of Brazil.

## 75 **Study design**

### 76 **Type of study**

77 In this qualitative study [12,13], we used the Grounded Theory (GT) as a  
78 methodological resource to guide data collection, analysis, and identification of  
79 the phenomenon [13]. Results were analyzed based on Brazilian TBI treatment  
80 guidelines, which recommended, at the time of data collection, TST or IGRA for  
81 PLWHA with CD4 count  $>350$  cells/mm<sup>3</sup>, those with lower levels TPT is  
82 recommended without TBI testing, CXR for all before prescription, and isoniazid  
83 as the preferred regimen [6,14]. It was anchored in the theoretical conceptions of  
84 Symbolic Interactionism (SI), where perspectives are socially created and  
85 changed according to groups and/or roles. SI facilitates the understanding that

86 the process of interaction with others enables an individual to acquire new  
87 perspectives, and these guide their way of acting [15]. We used the Standards  
88 for Reporting Qualitative Research (SRQR) guidelines to report this study [16,17].

## 89 **Participant selection**

90 Inclusion criteria was being a medical or nurse professional working for more than  
91 six months in HIV/Aids reference services and agreeing to participate by signing  
92 the informed consent. There were no exclusion criteria.

## 93 **Data collection**

94 Data collection was carried out in two public institutions of reference in HIV/Aids  
95 in the capital of Mato Grosso do Sul, located in the Midwest region of Brazil,  
96 between October 2020 and August 2022.

97 For data collection, a semi-structured interview [18] was used, guided by  
98 questions related to the knowledge and perception of professionals about TBI  
99 and TPT guidelines for PLWHA, and the bond between patient and service  
100 professionals. This script was originally validated by a medical professional and  
101 a nurse and, as there was no need for changes, they were included in the study  
102 sample. The interviews were recorded in audio by a psychologist and lasted an  
103 average of 15 minutes each. The interruption in data collection occurred due to  
104 the saturation of theoretical data when the emerged data became repetitive  
105 [19,20].

## 106 **Data analysis**

107 The collected data were transcribed in full and analyzed according to GT through  
108 coding in three stages: open, axial, and selective. In open coding, data were  
109 separated, compared, and analyzed line-by-line in detail, generating 568  
110 conceptual codes, which were later grouped by similarities and differences. In  
111 axial coding, the data were regrouped, clarifying explanations regarding the  
112 phenomena under investigation and allowing the emergence of categories. This  
113 regrouping followed the conditional/consequential paradigm composed of three  
114 components: condition, action-interaction and consequence. In selective coding,  
115 comparison and constant analysis were performed, refining the relationships  
116 between the four categories and ten subcategories, integrating them, and  
117 seeking to identify one central phenomenon [13,19].

## 118 **Results**

119 Fourteen participants were included, 10 were physicians and four were nurses.  
120 Of these, 10 were women, nine were married, and 14 lived in urban areas. Their  
121 mean age was 45 years. They had an average of 13 years of experience in  
122 HIV/Aids reference services, and an average of 22 years of training. Seven of the  
123 study participants had a doctorate, nine had a master degree, and 13 were  
124 specialized professionals.

125 The health professional (HCW) demonstrated a reasonable understanding of the  
126 concept of TBI and the TPT guidelines for PLWHA. They viewed the guidelines  
127 as an essential strategy for reducing deaths and transmission within the  
128 community. This perception is evident in the statements made by the participants  
129 in Table 1.

130 Table 1

131 However, the HCW also acknowledged the challenges associated with adhering  
132 to in-service guidelines. They specifically expressed concerns regarding patient  
133 vulnerability, which further complicates the issue of TPT adherence for medical  
134 professionals.

135 In this context, they build bonds to overcome different challenges in care for  
136 PLWHA (Table 1):

137 *“It's about saving lives. Therefore, providing assistance to HIV patients is not just a matter  
138 of providing support in the technical part, it also involves resolving the social issues,  
139 which I think is very important [...]” (P10)*

140 *“[...] The bond is very important, the better the patient gets, the more they adhere to  
141 guidelines and treatment [...]” (P7)*

142 And seeking strategies to facilitate adherence to the treatment guidelines in  
143 service:

144 *“[...] There would have to be an outpatient clinic for follow-up [...] perhaps the nursing  
145 clinic could be alternated with the medical clinic [...] there is a requirement of at least one  
146 or two more outpatient clinics, since the demand is very high [...]” (P6)*

147 Interacting with the multidisciplinary team and teaching:

148 *“[...] I think that care cannot be centered on the doctor's role [...] we need to further  
149 improve the multidisciplinary team” (P13)*

150 Embracing the patient with a focus on adherence and treatment:

151 *“[...] I always believe in information. The patients should be made aware of what TB is,*  
152 *what effects it may have on their lives, what TPT is, and the benefit that the patient has*  
153 *if he/she undergoes this treatment [...] about risks and side effects of the medication [...]*  
154 *inform in the best way the patient can understand. It is not only enough for me to speak,*  
155 *it is also important that the patient understands and grasps the message [...] I try to listen*  
156 *to the patient so that the process of reflection of his own life plays a role in decision*  
157 *making, since the patient has to have autonomy in that choice, but for him to have that*  
158 *autonomy in choosing, he needs be well-informed [...]’ (P9)*

159 This study sheds light on the perception of HCW regarding their knowledge and  
160 meaning of TPT in PLWHA, challenges faced due to weaknesses of the services,  
161 and the strategies that can be used to overcome these limitations.

## 162 **Discussion**

163 Knowledge of HCW contrasted with hesitations and uncertainties due to  
164 structural limitations of health facilities, but empathy, embracement and  
165 multidisciplinary interaction were perceived as enablers for quality care of  
166 PLWHA. Professionals perceive and value the bond strengthened in the service  
167 and use it as an instrument to overcome structural limitations in the care of  
168 PLWHA. Feelings, such as satisfaction, humanization, and empathy, were found  
169 to be facilitators of patient's attachment to the service. These findings were in  
170 accordance with SI conceptions, where people modulate their behavior based on  
171 the meaning they attribute to things and the social interaction established with  
172 others. People modify this meaning through interpretive process they use when  
173 faced with things and situations throughout their lives [15].

174 Knowledge of HCW regarding TBI and its management, along with the strategic  
175 importance of preventing TB and unfavorable outcomes in PLWHA have been  
176 previously reported [21-24].

177 Weaknesses in structural and organizational conditions of the services emerged  
178 as factors hindering the scale up of TBI treatment. This included other care  
179 demands in face of understaffed teams. Lack of training, irregularities in  
180 screening and during TPT, ill-defined responsibilities in prescription and record  
181 keeping, clinical misperception [25], lack of medication, fear of creating bacterial  
182 resistance, low acceptance of medication by patients, side effects, and lack of  
183 commitment from health managers have been identified as barriers to  
184 implementation of TPT [2]. A recent study in Brazil showed that educational  
185 interventions for HCW about TPT and its benefits were fundamental for the  
186 increase in treatment prescriptions [9]. Continuous efforts are necessary to  
187 improve TPT care among PLWHA [3].

188 Concerns regarding adverse reactions have emerged as a hindrance in the to  
189 TPT and in HCW team adherence. This can be minimized with regular monthly  
190 clinical follow-up and clear guidelines for patients [26]. Expansion of human  
191 resources and operational research [7], along with adequate economic  
192 perspectives for monitoring adverse events [27], have been indicated as  
193 strategies to overcome this issue. Still, the fear of prescribing TPT can be  
194 resolved with the use of short regimens which have shown greater safety and  
195 rare adverse events [28].

196 Patient vulnerability is also a concern for medical professionals regarding  
197 adherence to TPT. The relationship between vulnerabilities and Aids is



198 bidirectional and is strongly influenced by poverty and other markers of social  
199 exclusion. Different aspects linked to PLWHA reinforce and produce new  
200 vulnerabilities arising from the stigma of the disease, which impacts people's  
201 health even after four decades since the discovery of the disease [29]. Patients'  
202 specific needs must be addressed considering the local context, specific settings  
203 and conditions in which the TPT program would be implemented [30].

204 Combining communication skills and empathy is important for the establishment  
205 of satisfactory interpersonal relationships [31]. Strengthening this bond is  
206 necessary to empower the patient to face the stigma of the disease, and to favor  
207 adherence to treatment [6,32,33]. Facilitation of access and bonding, promptness  
208 of care, health professional and patient relationship, duration of appointments,  
209 language used, and availability of references for necessary referrals are  
210 fundamental requirements of services to promote adherence to treatment [6].  
211 Intensification of strategies for adherence to HIV/TB co-infection prevention  
212 treatment is a priority [34].

213 This study has a few limitations. It was conducted in a single city, in a country  
214 with over 5000 municipalities', and the perspective of HCW may be different  
215 according to the multiple existing scenarios. In addition, it is restricted to the HCW  
216 perspective. The users' perspective is equally important to understand the  
217 dropouts in the TPT cascade of care. However, there is a paucity of qualitative  
218 studies on TPT in PLWHA, and this study clearly identified the central  
219 phenomenon "Facing challenges in the implementation of TPT in the light of  
220 scientific evidence", and the strategies to overcome barriers.

## 221 **Ethics statement**

222 This study was conducted in accordance with the tenets of Declaration of  
223 Helsinki. It was approved by the Ethics Committee for Research with Human  
224 Beings of the Federal University of Mato Grosso do Sul on November 2, 2020 (#  
225 4.375.024). Written informed consent was obtained from all the study  
226 participants. To maintain secrecy and anonymity, the participants were  
227 represented by the letter “P” followed by the number corresponding to the order  
228 of the interviews (P1, P2, P3 ...).

### 229 **Conflict of Interest**

230 The authors declare that the research was conducted in the absence of any  
231 commercial or financial relationships that could be construed as a potential  
232 conflict of interest.

### 233 **Author Contributions**

234 VSR, DPGN and SMVLO were responsible for the design and conduct of the  
235 study, data analysis, writing and review of the article. VSR contributed with the  
236 transcription of the interviews. TAS carried out the interviews, initial analysis and  
237 review of the article. GF, RF contributed with the transcription of interviews, initial  
238 categorization of data, writing and formatting of the article. ACGN, AMMP, EFL  
239 assisted in data analysis and article review. AT contributed to the data analysis  
240 and review of the article. All authors approved the submitted version.

### 241 **Funding**

242 This study was supported by the (Oswaldo Cruz Foundation) Fiocruz and Federal  
243 University of Mato Grosso do Sul and the Coordination for the Improvement of  
244 Higher Education Personnel (CAPES) – Brazil. Financial code 001.

## 245 **Data Availability Statement**

246 The raw data supporting the conclusions of this article will be made available by  
247 the authors, without undue reservation.

## 248 **Acknowledgments**

249 To all the nurses and physicians, from the reference services in HIV/Aids, who  
250 contributed as participants in this study.

## 251 **Reference**

- 252 1. World Health Organization (WHO). Global Tuberculosis Report 2021.  
253 Geneva: WHO; 2021. Available from: [https://www.who.int/teams/global-](https://www.who.int/teams/global-tuberculosis-programme/tb-reports/global-tuberculosis-report-2021)  
254 [tuberculosis-programme/tb-reports/global-tuberculosis-report-2021](https://www.who.int/teams/global-tuberculosis-programme/tb-reports/global-tuberculosis-report-2021)
- 255 2. Teklay G, Teklu T, Legesse B, Tedla K, Klinkenberg E. Barriers in the  
256 implementation of isoniazid preventive therapy for people living with HIV in  
257 Northern Ethiopia: a mixed quantitative and qualitative study. BMC Pub Health.  
258 2016 Aug; 16(1):840. Available from:  
259 <https://www.ncbi.nlm.nih.gov/pmc/articles/PMC4992328/>
- 260 3. Bastos ML, Melnychuk L, Campbell JR, Oxlade O, Menzies D. The latent  
261 tuberculosis cascade-of-care among people living with HIV: A systematic review  
262 and meta-analysis. PLoS Med. 2021 Sep; 18(9):e1003703. Available from:  
263 <https://www.ncbi.nlm.nih.gov/pmc/articles/PMC8439450/>
- 264 4 - World Health Organization. Global tuberculosis report 2019. Geneva: WHO;  
265 2019. Available from:  
266 [https://apps.who.int/iris/bitstream/handle/10665/329368/9789241565714-](https://apps.who.int/iris/bitstream/handle/10665/329368/9789241565714-eng.pdf?ua=1)  
267 [eng.pdf?ua=1](https://apps.who.int/iris/bitstream/handle/10665/329368/9789241565714-eng.pdf?ua=1)
- 268 5 - World Health Organization. Global Tuberculosis Report 2022. Geneva:  
269 WHO; 2022. Available from: [https://www.who.int/teams/global-tuberculosis-](https://www.who.int/teams/global-tuberculosis-programme/tb-reports/global-tuberculosis-report-2022)  
270 [programme/tb-reports/global-tuberculosis-report-2022](https://www.who.int/teams/global-tuberculosis-programme/tb-reports/global-tuberculosis-report-2022)
- 271 6 - Ministério da Saúde (Brasil), Secretaria de Vigilância em Saúde,  
272 Departamento de Vigilância das Doenças Transmissíveis. Manual de  
273 Recomendações para o Controle da Tuberculose no Brasil 3a. ed. Brasília:  
274 Ministério da Saúde; 2019. 364 p. Available from:  
275 [https://bvsmms.saude.gov.br/bvs/publicacoes/manual\\_recomendacoes\\_controle\\_](https://bvsmms.saude.gov.br/bvs/publicacoes/manual_recomendacoes_controle_tuberculose_brasil_2_ed.pdf)  
276 [tuberculose\\_brasil\\_2\\_ed.pdf](https://bvsmms.saude.gov.br/bvs/publicacoes/manual_recomendacoes_controle_tuberculose_brasil_2_ed.pdf)
- 277 7 - Bastos ML, Oxlade O, Benedetti A, Fregonese F, Valiquette C, Lira SCC,  
278 Carvalho-Cordeiro D, Cavalcante JR, Faerstein E, Albuquerque MFM, Cordeiro-

- 279 Santos M, Hill PC, Menzies D, Trajman A. A public health approach to increase  
280 treatment of latent TB among household contacts in Brazil. *Int J Tuberc Lung*  
281 *Dis.* 2020 Oct 1;24(10). Available from:  
282 [https://www.ingentaconnect.com/content/iuatld/ijtld/2020/00000024/00000010/a](https://www.ingentaconnect.com/content/iuatld/ijtld/2020/00000024/00000010/art00005;jsessionid=6oh70t2e9b6cn.x-ic-live-02#)  
283 [rt00005;jsessionid=6oh70t2e9b6cn.x-ic-live-02#](https://www.ingentaconnect.com/content/iuatld/ijtld/2020/00000024/00000010/art00005;jsessionid=6oh70t2e9b6cn.x-ic-live-02#)
- 284 8 - Bastos ML, Oxlade O, Campbell JR, Faerstein E, Menzies D, Trajman A.  
285 Scaling up investigation and treatment of household contacts of tuberculosis  
286 patients in Brazil: a cost-effectiveness and budget impact analysis. *Lancet Reg*  
287 *Health Am.* 2022 Jan; 10(8). Available from:  
288 <https://www.ncbi.nlm.nih.gov/pmc/articles/PMC9903685/>
- 289 9 - Yanes-Lane M, Trajman A, Bastos ML, Oxlade O, Valiquette C, Rufino N,  
290 Fregonese F, Menzies D. Effects of programmatic interventions to improve the  
291 management of latent tuberculosis: a follow up study up to five months after  
292 implementation. *BMC Public Health.* 2021 Jan; 21(1). Available from:  
293 <https://www.ncbi.nlm.nih.gov/pmc/articles/PMC7819253/>
- 294 10 - Sobral L, Arriaga MB, Souza AB, Araújo-Pereira M, Barreto-Duarte B,  
295 Sales C, Rocha MS, Benjamin A, Moreira ASR, de Oliveira JG, Carvalho AC,  
296 Spener-Gomes R, Figueiredo MC, Cavalcante S, Durovni B, Lapa-E-Silva JR,  
297 Kritski AL, Rolla VC, Sterling TR, Cordeiro-Santos M, Andrade BB.  
298 Determinants of losses in the tuberculosis infection cascade of care among  
299 children and adolescent contacts of pulmonary tuberculosis cases: A Brazilian  
300 multi-centre longitudinal study. *Lancet Reg Health Am.* 2022 Nov;15:100358.  
301 doi: 10.1016/j.lana.2022.100358. Epub 2022 Aug 23. PMID: 36438860; PMCID:  
302 [PMC9696515](https://pubmed.ncbi.nlm.nih.gov/36438860/). Available from: <https://pubmed.ncbi.nlm.nih.gov/36438860/>
- 303 11 - Alsdurf H, Hill PC, Matteelli A, Getahun H, Menzies D. The cascade of care  
304 in diagnosis and treatment of latent tuberculosis infection: a systematic review  
305 and meta-analysis. *Lancet Infect Dis.* 2016 Nov;16(11):1269-78. Available from:  
306 <https://pubmed.ncbi.nlm.nih.gov/27522233/>
- 307 12- Minayo, M. C. S. Ética das pesquisas qualitativas segundo suas  
308 características. *Revista Pesquisa Qualitativa.* 2021 Dez; 9(22): 521-539.  
309 Available from: <https://editora.sepq.org.br/rpq/article/view/506/290>
- 310 13- Corbin J, Strauss A. Basics of qualitative research: techniques and  
311 procedures for developing Grounded Theory. California: SAGE; 2015.
- 312 14 - Ministério da Saúde (Brasil), Secretaria de Vigilância em Saúde,  
313 Departamento de Vigilância das Doenças Transmissíveis. Protocolo de  
314 vigilância da infecção latente pelo Mycobacterium tuberculosis no Brasil. 1a. ed.  
315 Brasília: Ministério da Saúde; 2018. 32 p. Available from:  
316 [https://bvsms.saude.gov.br/bvs/publicacoes/protocolo\\_vigilancia\\_infeccao\\_laten](https://bvsms.saude.gov.br/bvs/publicacoes/protocolo_vigilancia_infeccao_latente_mycobacterium_tuberculosis_brasil.pdf)  
317 [te\\_mycobacterium\\_tuberculosis\\_brasil.pdf](https://bvsms.saude.gov.br/bvs/publicacoes/protocolo_vigilancia_infeccao_latente_mycobacterium_tuberculosis_brasil.pdf)
- 318 15 - Blumer H. Symbolic interactionism: perspective e method. Berkeley (US):  
319 University of Califórnia; 1969.

- 320 16 - O'brien BC, Harris IB, Beckman TJ, Reed DA, Cook DA. Standards for  
321 reporting qualitative research: a synthesis of recommendations. Acad Med.  
322 2014 Sep; 89(9):1245-51. Available from:  
323 <https://pubmed.ncbi.nlm.nih.gov/24979285/>
- 324 17 - Saab MM, O'driscoll M, Fitzgerald S, Sahm LJ, Leahy-Warren P, Noonan  
325 B; et al. Primary healthcare professionals' perspectives on patient help-seeking  
326 for lung cancer warning signs and symptoms: a qualitative study. BMC Prim  
327 Care. 2022 May; 23(1):119. Available from:  
328 [https://www.ncbi.nlm.nih.gov/pmc/articles/PMC9114293/pdf/12875\\_2022\\_Article\\_1730.pdf](https://www.ncbi.nlm.nih.gov/pmc/articles/PMC9114293/pdf/12875_2022_Article_1730.pdf)  
329
- 330 18 - Moser A, Korstjens I. Series: Practical guidance to qualitative research.  
331 Part 3: Sampling, data collection and analysis. Eur J Gen Pract. 2018 Dec;  
332 24(1):9-18. Available from:  
333 <https://www.ncbi.nlm.nih.gov/pmc/articles/PMC5774281/>
- 334 19 - Strauss A, Corbin J. Pesquisa Qualitativa: técnicas e procedimentos para o  
335 desenvolvimento de teoria fundamentada. 2a. ed. Porto Alegre: Artmed; 2008.
- 336 20 - Minayo MCS, COSTA AP. Fundamentos Teóricos das Técnicas de  
337 Investigação Qualitativa. Revista Lusófona de Educação. 2018; 40(1):139-53.  
338 Available from: [file:///C:/Users/user/Downloads/6439-Texto%20do%20artigo-19398-1-10-20180827%20\(2\).pdf](file:///C:/Users/user/Downloads/6439-Texto%20do%20artigo-19398-1-10-20180827%20(2).pdf)  
339
- 340 21- Macneil A, Glaziou P, Sismanidis C, Date A, Maloney S, Floyd K. Global  
341 Epidemiology of Tuberculosis and Progress Toward Meeting Global Targets -  
342 Worldwide, 2018. MMWR Morb Mortal Wkly Rep. 2020 Mar; 69(11):281-85.  
343 Available from: <https://www.ncbi.nlm.nih.gov/pmc/articles/PMC7739980/>
- 344 22- Picone CM, Freitas AC, Gutierrez EB, Silva VIA. Acesso e adesão à terapia  
345 preventiva com isoniazida e ocorrência de TB ativa em uma coorte de pessoas  
346 vivendo com HIV: um estudo de coorte retrospectivo em São Paulo, Brasil.  
347 Revista do Instituto de Medicina Tropical de São Paulo. 2020; 62(8). Available  
348 from:  
349 <https://www.scielo.br/j/rimtsp/a/XgVGv9MCnTMKCZ89S5kxrbH/abstract/?lang=en#>  
350
- 351 23- Hasan T, Au E, Chen S, Tong A, Wong G. Screening and prevention for  
352 latent tuberculosis in immunosuppressed patients at risk for tuberculosis: a  
353 systematic review of clinical practice guidelines. BMJ Open. 2018 Set; 08(9):01-  
354 14. Available from:  
355 <https://www.ncbi.nlm.nih.gov/pmc/articles/PMC6144320/pdf/bmjopen-2018-022445.pdf>  
356
- 357 24- Oxlade O, Trajman A, Benedetti A, Adjobimey M, Cook VK, Fisher D.; et al.  
358 Enhancing the public health impact of latent tuberculosis infection diagnosis and  
359 treatment (ACT4): protocol for a cluster randomised trial. BMJ Open. 2019 Jan.  
360 Available from: <https://bmjopen.bmj.com/content/bmjopen/9/3/e025831.full.pdf>

- 361 25- Roscoe C, Lockhart C, De Klerk M, Baughman A, Agolory S, Gawanab M;  
362 et al. Evaluation of the uptake of tuberculosis preventative therapy for people  
363 living with HIV in Namibia: a multiple methods analysis. BMC Public Health 20.  
364 2020 Apr; 1838. Available from:  
365 [https://bmcpublichealth.biomedcentral.com/articles/10.1186/s12889-020-09902-](https://bmcpublichealth.biomedcentral.com/articles/10.1186/s12889-020-09902-z#citeas)  
366 [z#citeas](https://bmcpublichealth.biomedcentral.com/articles/10.1186/s12889-020-09902-z#citeas)
- 367 26- Getahun H, Matteelli A, Abubakar I, Aziz MA, Baddeley A, Barreira D; et al.  
368 Management of latent Mycobacterium tuberculosis infection: WHO guidelines  
369 for low tuberculosis burden countries. Eur Respir J. 2015 Dec; 46(6):1563–76.  
370 Available from: <https://www.ncbi.nlm.nih.gov/pmc/articles/PMC4664608/>
- 371 27- Sotgiu G, Matteelli A, Getahun H, Girardi E, Sañé Schepisi M, Centis R; et  
372 al. Monitoring toxicity in individuals receiving treatment for latent tuberculosis  
373 infection: a systematic review versus expert opinion. Eur Respir J. 2015 Apr;  
374 45(4):1170-3. Available from:  
375 <https://www.ncbi.nlm.nih.gov/pmc/articles/PMC4391659/>
- 376 28 - Sterling TR, Njie G, Zenner D, Cohn DL, Reves R, Ahmed A, Menzies D,  
377 Horsburgh CR Jr, Crane CM, Burgos M, LoBue P, Winston CA, Belknap R.  
378 Guidelines for the Treatment of Latent Tuberculosis Infection:  
379 Recommendations from the National Tuberculosis Controllers Association and  
380 CDC, 2020. MMWR Recomm Rep. 2020 Feb 14;69(1):1-11. doi:  
381 10.15585/mmwr.rr6901a1. PMID: 32053584; PMCID: PMC7041302. Available  
382 from: <https://www.ncbi.nlm.nih.gov/pmc/articles/PMC7041302/>
- 383 29 - Damião JJ, Rafael A, Maksud I, Filgueiras S, Rocha F, Maia AC; et al.  
384 Cuidando de Pessoas Vivendo com HIV/Aids na Atenção Primária à Saúde:  
385 nova agenda de enfrentamento de vulnerabilidades? Saúde em Debate. 2022;  
386 46(132):163-74. Available from:  
387 <https://www.scielo.br/j/sdeb/a/XqmLCJ7cLZg94kp8DjjqKSy/#>
- 388 30 - Stuurman AL, Vonk NSM, Van Kessel F, Oordt-Speets AM, Sandgren A,  
389 Van Der Werf MJ. Interventions for improving adherence to treatment for latent  
390 tuberculosis infection: a systematic review. BMC Infect Dis. 2016 Jun;  
391 8(16):257. Available from:  
392 <https://www.ncbi.nlm.nih.gov/pmc/articles/PMC4897858/>
- 393 31 - Gulate NDG, Velho MTAC, Gonçalves KCS; Beschoren NF. A Relação  
394 Clínica e a Comunicação de Notícias Difíceis com o Auxílio das Artes e dos  
395 Relatos Vivos. Abordando a Relação Clínica e Comunicando Notícias Difíceis  
396 com o Auxílio das Artes e das Histórias Vivas. Rev Bras Educ Med. 2019;  
397 43(4):131-40. Available from:  
398 <https://www.ncbi.nlm.nih.gov/pmc/articles/PMC8087288/>
- 399 32 - Da Silva RD, De Luna FDT, De Araújo AJ, Camêlo ELS, Bertolozzi MR,  
400 Hino P; et al. Patients' perception regarding the influence of individual and  
401 social vulnerabilities on the adherence to tuberculosis treatment: a qualitative  
402 study. BMC Public Health. 2017 Sep; 17(1):725. Available from:  
403 <https://www.ncbi.nlm.nih.gov/pmc/articles/PMC5606083/>

- 404 33 - Souza LLL, Santos FLD, Crispim JA, Fiorati RC, Dias S, Bruce ATI; et al.  
405 Causes of multidrug-resistant tuberculosis from the perspectives of health  
406 providers: challenges and strategies for adherence to treatment during the  
407 COVID-19 pandemic in Brazil. BMC Health Serv Res. 2021 Oct; 21(1):1033.  
408 Available from: <https://www.ncbi.nlm.nih.gov/pmc/articles/PMC8483800/>
- 409 34- Ministério da Saúde (Brasil), Secretaria-Executiva. Recomendações para o  
410 manejo da coinfeção TB-HIV em serviços de atenção especializada a pessoas  
411 vivendo com HIV/AIDS. 1a. ed. Brasília: Ministério da Saúde; 2013. 28 p.  
412 Available from:  
413 [https://bvsmms.saude.gov.br/bvs/publicacoes/recomendacoes\\_manejo\\_coinfecca](https://bvsmms.saude.gov.br/bvs/publicacoes/recomendacoes_manejo_coinfeccao_tb_hiv.pdf)  
414 [o\\_tb\\_hiv.pdf](https://bvsmms.saude.gov.br/bvs/publicacoes/recomendacoes_manejo_coinfeccao_tb_hiv.pdf)

Table 1: Phenomenon, categories, subcategories and open codes that emerged from the interviews.

| PHENOMENON                                                                    | CATEGORIES                                                                                                          | SUBCATEGORIES                                                                   | OPEN CODES                                                                                                                                                                                                                                                                                                                                                                                                                                                                                                                                                                                                                                                                                                    |
|-------------------------------------------------------------------------------|---------------------------------------------------------------------------------------------------------------------|---------------------------------------------------------------------------------|---------------------------------------------------------------------------------------------------------------------------------------------------------------------------------------------------------------------------------------------------------------------------------------------------------------------------------------------------------------------------------------------------------------------------------------------------------------------------------------------------------------------------------------------------------------------------------------------------------------------------------------------------------------------------------------------------------------|
| <p>Facing challenges in implementing TPT in light of scientific evidence.</p> | <p>CONTEXTUAL CONDITIONS</p> <p>Demonstrating theoretical knowledge regarding TBI and its treatment guidelines.</p> | <p>Conceptualizing TBI and conditioning factors for outcomes in PLWHA.</p>      | <p><i>"[...] TBI is when the person had contact with the bacillus, but did not develop the disease [...]" (P3)</i></p> <p><i>"[...] And specifically in HIV patients, since they have a compromised immunity, and reactivation of granulomas can occur in the immunosuppression phase, thereby resulting in an active infection [...]" (P13)</i></p> <p><i>"[...] About twenty-five to thirty percent of the general population has TBI [...] In general, ten percent of those infected will get sick one day in their lives. However, some people have a higher risk of getting sick from the infection [...]" (P7)</i></p>                                                                                  |
|                                                                               |                                                                                                                     | <p>Considering the cascade of care guidelines from diagnosis of TBI to TPT.</p> | <p><i>"There is a guidelines that recommends that every HIV patient with less than three hundred and fifty CD4 cells should undergo TPT, even if a diagnosis cannot be made [...] any individual with more than three hundred and fifty CD4 cells should first undergo an examination to find out if the person has TBI [...]" (P7)</i></p> <p><i>"[...] For example, in our patients with HIV who usually undergo treatment, we ask for an annual examination to check for their carrier status, as long as they are not symptomatic, do not show any altered X-ray findings. The treatment for such patients is commenced with isoniazid, which is the preferred regimen at the moment [...]" (P11)</i></p> |
|                                                                               |                                                                                                                     | <p>Evidencing the guidelines as prevention of TB</p>                            | <p><i>"I think an important guidelines in the face of TB [...] is high mortality rate from TB in PLWHA. Early identification of the infection [...] will contribute to better survival condition of these patients [...]" (P2)</i></p>                                                                                                                                                                                                                                                                                                                                                                                                                                                                        |



|                        |                                                                   |                                                                                              |                                                                                                                                                                                                                                                                                                                                                                                                                                                                                                                                                                                                                                                                                                            |
|------------------------|-------------------------------------------------------------------|----------------------------------------------------------------------------------------------|------------------------------------------------------------------------------------------------------------------------------------------------------------------------------------------------------------------------------------------------------------------------------------------------------------------------------------------------------------------------------------------------------------------------------------------------------------------------------------------------------------------------------------------------------------------------------------------------------------------------------------------------------------------------------------------------------------|
|                        |                                                                   | and deaths.                                                                                  | <i>"[...] Having the opportunity to diagnose LTBI and offering treatment in order to prevent PLWHA from getting sick is a good strategy [...]" (P9)</i>                                                                                                                                                                                                                                                                                                                                                                                                                                                                                                                                                    |
| INTERVENING CONDITIONS | Dealing with the complexities of guidelines adherence in service. | Describing structural and organizational obstacles in service.                               | <i>"[...] The difficulty of instituting therapy for everyone under three hundred and fifty CD4 count is due to logistics [...] precisely because of the difficulty of monitoring and not having a specific outpatient clinic for TBI. There would be many people requiring follow up, and in today's scenario, there are no fully operating outpatient clinics, even for the general population [...]" (P6)</i><br><br><i>"[...] a very big concern with the adverse effects of TPT is [...] you have to monitor these patients more frequently, not only checking for their adherence to the guidelines, but also to see if they have hepatitis, or any adverse reaction to the treatment [...]" (P7)</i> |
|                        |                                                                   | Revealing patients' vulnerabilities and insecurities with diagnosis and therapeutic regimen. | <i>"[...] social issues are an important factor. Not all patients are able to follow up and seek treatment due to social issues, lack of money, lack of transportation [...]" (P2)</i><br><br><i>"[...] Many people do not understand why they are using the medication, while there are few who completely understand the need and intention of treatment [...]" (P8)</i>                                                                                                                                                                                                                                                                                                                                 |
| INTERACTION IN CARE    | Building bonds                                                    | Having positive experiences with the calls.                                                  | <i>"If I could describe it in one word, it would be humanity [...] when these patients come in here, just the fact that you tell them 'look, you are not here to be judged', they open up their hearts [...]" (P11)</i><br><br><i>"It's about saving lives. Therefore, providing assistance to HIV patients is not just a matter of providing support in the technical part, it also involves resolving the social issues, which I think is very important [...]" (P10)</i>                                                                                                                                                                                                                                |
|                        |                                                                   |                                                                                              | <i>"[...] The bond is very important, the better the patient gets, the more they adhere to guidelines and treatment [...]" (P7)</i>                                                                                                                                                                                                                                                                                                                                                                                                                                                                                                                                                                        |

|                                                                                                                                  |                                                        |                                                                        |                                                                                                                                                                                                                                                                                                                                                                                                                                                                                                                                                                                                                                                                                                                                                                                                                                                                                                            |
|----------------------------------------------------------------------------------------------------------------------------------|--------------------------------------------------------|------------------------------------------------------------------------|------------------------------------------------------------------------------------------------------------------------------------------------------------------------------------------------------------------------------------------------------------------------------------------------------------------------------------------------------------------------------------------------------------------------------------------------------------------------------------------------------------------------------------------------------------------------------------------------------------------------------------------------------------------------------------------------------------------------------------------------------------------------------------------------------------------------------------------------------------------------------------------------------------|
|                                                                                                                                  | to overcome different challenges in the care of PLWHA. | Noticing the strengthening of bond in service.                         | <p><i>"[...] the professionals who deal with HIV already have a characteristic ease of embracing. This embracement generates an empathy that greatly facilitates the bond [...] the empathy of professionals who have been working with HIV/Aids patients for some time is more natural [...]" (P2)</i></p>                                                                                                                                                                                                                                                                                                                                                                                                                                                                                                                                                                                                |
| <p><b>STRATEGIES FOR ADHERENCE</b></p> <p>Seeking strategies to facilitate adherence to the treatment guidelines in service.</p> |                                                        | Glimpsing ideal conditions for adherence to the guidelines in service. | <p><i>"[...] One way to strengthen the bond would be to have a social service professional with us [...]" (P3)</i></p> <p><i>"[...] There would have to be an outpatient clinic for follow-up [...] perhaps the nursing clinic could be alternated with the medical clinic [...] there is a requirement of at least one or two more outpatient clinics, since the demand is very high [...]" (P6)</i></p> <p><i>"[...] I would like it to be in an ideal world [...] with more number of medical professionals, receptionists, and more space [...] because the access barrier still persists [...] in terms of adherence to the guidelines, we are concerned about the adverse effects of TPT [...] these patients require more frequent monitoring, not only for them to adhere to the guidelines but also to check if they have hepatitis, or any adverse reaction to the treatment [...]" (P7)</i></p> |
|                                                                                                                                  |                                                        | Interacting with the multidisciplinary team and teaching.              | <p><i>"[...] I think that care cannot be centered on the doctor's role [...] we need to further improve the multidisciplinary team" (P13)</i></p> <p><i>"[...] Research is very important, students actively search for dropouts in TPT project, another class with HIV patient [...] so with the help of nurses and nursing students, the outpatient care of PLHIV could be improved" (P3)</i></p>                                                                                                                                                                                                                                                                                                                                                                                                                                                                                                        |
|                                                                                                                                  |                                                        | Embracing the patient with a focus on adherence and treatment.         | <p><i>"[...] Treating these patients with affection, sometimes that's what's missing, and not being judgmental helps[...] you have to try to enter their world [...]" (P11)</i></p> <p><i>"[...] I always believe in information. The patients should be made aware of what TB is, what effects it may have on their lives, what TPT is, and the benefit that the patient has if he/she undergoes this treatment [...] about risks and side effects of the medication [...] inform in the best way the patient can understand. It is not only enough for me to speak, it is also important</i></p>                                                                                                                                                                                                                                                                                                         |

|  |  |  |                                                                                                                                                                                                                                                                                                                                |
|--|--|--|--------------------------------------------------------------------------------------------------------------------------------------------------------------------------------------------------------------------------------------------------------------------------------------------------------------------------------|
|  |  |  | <i>that the patient understands and grasps the message [...] I try to listen to the patient so that the process of reflection of his own life plays a role in decision making, since the patient has to have autonomy in that choice, but for him to have that autonomy in choosing, he needs be well-informed [...]' (P9)</i> |
|--|--|--|--------------------------------------------------------------------------------------------------------------------------------------------------------------------------------------------------------------------------------------------------------------------------------------------------------------------------------|
